# Supplementary material for: Phenoxazine-Dibenzothiophene Sulfoximine Emitters Featuring Both Thermally Activated Delayed Fluorescence and Aggregation Induced Emission
Source: MDPI journal article supplement (doi:10.3390/molecules26175243), 2021-08-29
Supplement: s1 [file s1]

## Supporting information

### **Phenoxazine-dibenzothiophene sulfoximine emitters featuring both thermally activated delayed fluorescence and aggregation induced emission**

*Yiyu Yang,<sup>a,b</sup> Ran Xiao,<sup>a,b</sup> Xiaosong Cao,<sup>a,\*</sup> Zhanxiang Chen,<sup>c</sup> Xialei Lv,<sup>a</sup> Youming Zhang,<sup>a\*</sup> Shaolong Gong,<sup>c</sup> Yang Zou,<sup>a</sup> and Chuluo Yang<sup>a,c</sup>*

#### **Corresponding authors**

\*xcao@szu.edu.cn

\*zhangyouming1218@126.com

### **Table of Contents**

|                                                                                                                                                                                                                                    |   |
|------------------------------------------------------------------------------------------------------------------------------------------------------------------------------------------------------------------------------------|---|
| <b>Figure S1.</b> The thermogravimetric analysis (TGA) plots of PXZ-SFIS, PXZ-SFIC and PXZ-SFIP under N <sub>2</sub> stream (flow rate: 20 mL min <sup>-1</sup> ; heating rate: 10 °C min <sup>-1</sup> ).....                     | 3 |
| <b>Figure S2.</b> DSC thermograms (second heating cycle) of <b>PXZ-SFIS</b> , <b>PXZ-SFIC</b> and <b>PXZ-SFIP</b> under N <sub>2</sub> stream (flow rate: 20 mL min <sup>-1</sup> ; heating rate: 10 °C min <sup>-1</sup> ). ..... | 3 |
| <b>Figure S3.</b> Cyclic voltammograms of <b>PXZ-SFIP</b> , <b>PXZ-SFIC</b> , and <b>PXZ-SFIS</b> in 1×10 <sup>-3</sup> M dichloromethane.....                                                                                     | 4 |
| <b>Figure S4.</b> PL spectra of (a) <b>PXZ-SFIC</b> and (b) <b>PXZ-SFIS</b> in THF/H <sub>2</sub> O mixed solvents with different water volume fractions.....                                                                      | 4 |
| <b>Figure S5.</b> Transient PL decay curves of <b>PXZ-SFIP</b> , <b>PXZ-SFIC</b> , and <b>PXZ-SFIS</b> in 1×10 <sup>-5</sup> M toluene solution.....                                                                               | 5 |
| <b>Table S1.</b> Natural transition orbitals (NTO) in the S <sub>1</sub> and T <sub>1</sub> states of the TADF emitters.....                                                                                                       | 2 |
| <b>Table S2.</b> Thermal analysis of the three compounds.....                                                                                                                                                                      | 3 |

## Theoretical Calculation

**Table S1.** Natural transition orbitals (NTO) in the  $S_1$  and  $T_1$  states of the TADF emitters.

| Emitter         | State | <i>Hole</i>                                                                                       | <i>Particle</i>                                                                       |
|-----------------|-------|---------------------------------------------------------------------------------------------------|---------------------------------------------------------------------------------------|
| <b>PXZ-SFIP</b> | $S_1$ | 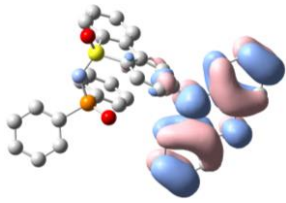<br>$f=0.0177$   |    |
|                 | $T_1$ | <br>$f=0.0000$   |    |
| <b>PXZ-SFIC</b> | $S_1$ | <br>$f=0.0028$  |   |
|                 | $T_1$ | <br>$f=0.0000$ |  |
| <b>PXZ-SFIS</b> | $S_1$ | <br>$f=0.0001$ |  |
|                 | $T_1$ | <br>$f=0.0000$ |  |

## Thermal Properties

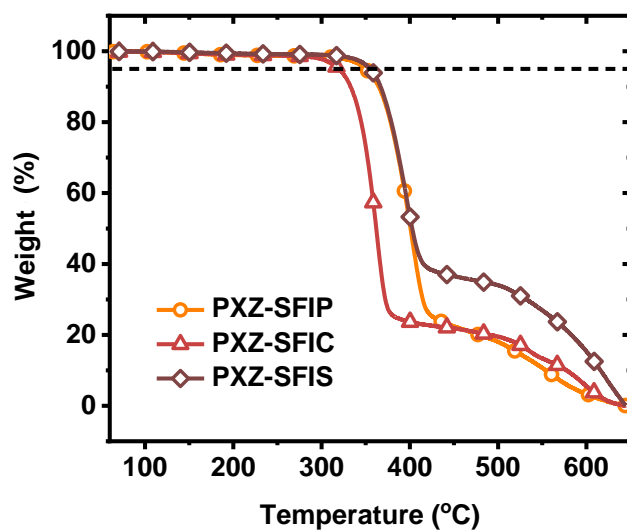

**Figure S1.** The thermogravimetric analysis (TGA) plots of PXZ-SFIS, PXZ-SFIC and PXZ-SFIP under N<sub>2</sub> stream (flow rate: 20 mL min<sup>-1</sup>; heating rate: 10 °C min<sup>-1</sup>).

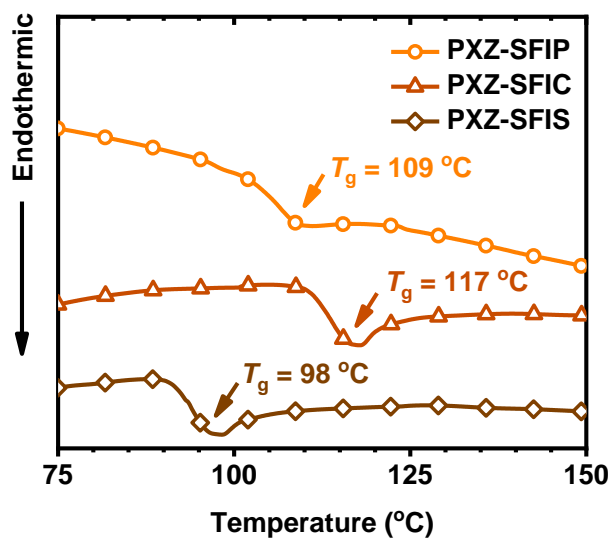

**Figure S2.** DSC thermograms (second heating cycle) of PXZ-SFIS, PXZ-SFIC and PXZ-SFIP under N<sub>2</sub> stream (flow rate: 20 mL min<sup>-1</sup>; heating rate: 10 °C min<sup>-1</sup>).

**Table S2.** Thermal analysis of the three compounds.

| Compound | T <sub>g</sub> <sup>a)</sup><br>(°C) | T <sub>d</sub> <sup>b)</sup><br>(°C) |
|----------|--------------------------------------|--------------------------------------|
| PXZ-SFIP | 109                                  | 350                                  |
| PXZ-SFIC | 117                                  | 320                                  |
| PXZ-SFIS | 98                                   | 355                                  |

## Electrochemical Properties

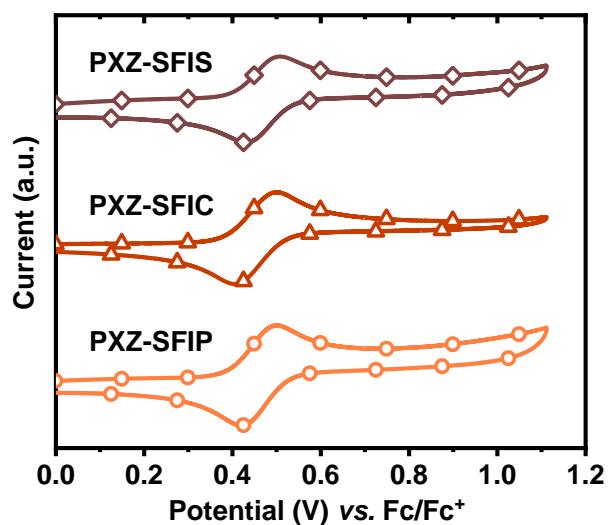

**Figure S3.** Cyclic voltammograms of **PXZ-SFIP**, **PXZ-SFIC**, and **PXZ-SFIS** in  $1 \times 10^{-3}$  M dichloromethane.

## Photophysical Properties

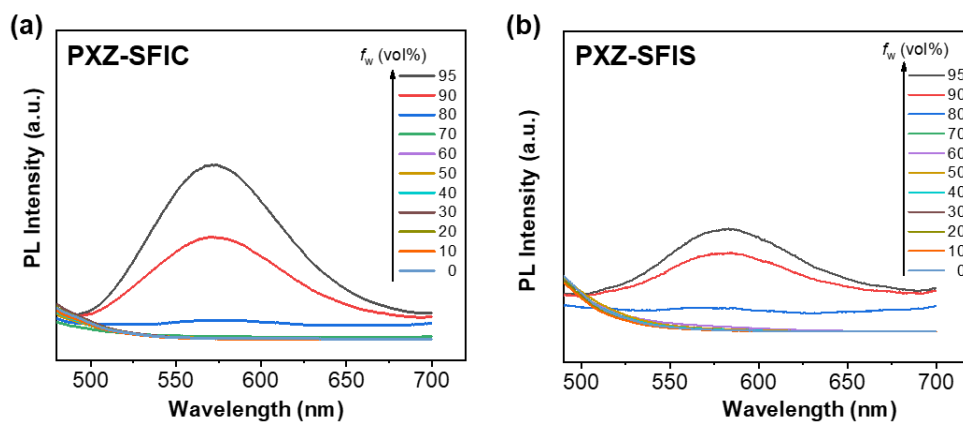

**Figure S4.** PL spectra of (a) **PXZ-SFIC** and (b) **PXZ-SFIS** in THF/H<sub>2</sub>O mixed solvents with different water volume fractions.

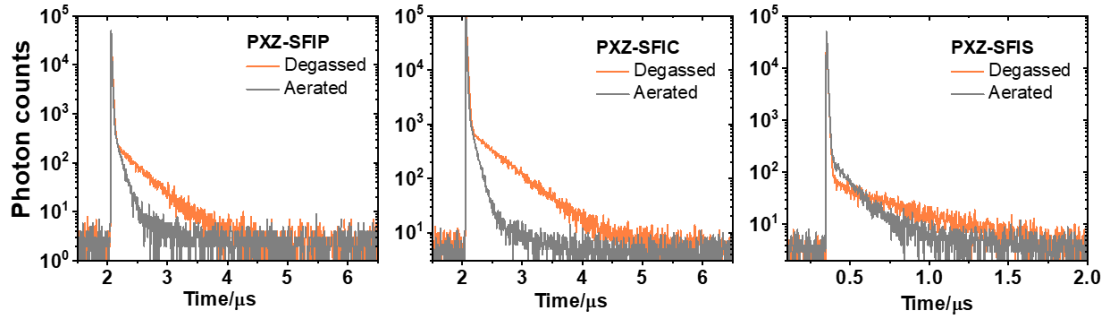

**Figure S5.** Transient PL decay curves of PXZ-SFIP, PXZ-SFIC, and PXZ-SFIS in  $1 \times 10^{-5}$  M toluene solution.

## Calculations of Rate Constants

The rate constants of radiative decay ( $k_{r,S}$ ) and nonradiative decay ( $k_{nr,S}$ ) from  $S_1$  to  $S_0$  states, the rate constants of intersystem crossing ( $k_{ISC}$ ) and reverse intersystem crossing ( $k_{RISC}$ ) could be estimated using the following equations: [1, 2]

$$k_{r,S} = \Phi_p k_p + \Phi_d k_d \approx \Phi_p k_p \dots \dots \dots \text{Eq.(1)}$$

where  $\Phi_p$  and  $\Phi_d$  indicate prompt and delayed fluorescence components and can be distinguished from the total  $\Phi_{PL}$  by comparing the integrated intensities of prompt and delayed components in the transient PL spectra; whereas  $k_p$  and  $k_d$  represent the decay rate constants for prompt and delayed fluorescence, respectively, which are determined experimentally from the decay fluorescence time constants ( $\tau_p$  and  $\tau_d$ , addressed in the main text).

$$k_p = \frac{1}{\tau_p} \dots \dots \dots \text{Eq.(2)}$$

$$k_d = \frac{1}{\tau_d} \dots \dots \dots \text{Eq.(3)}$$

$$k_{nr,S} = \frac{1 - \Phi_{PL}}{\Phi_{PL}} k_{r,S} \dots \dots \dots \text{Eq.(4)}$$

$$k_{ISC} = k_p - k_{r,S} - k_{nr,S} \dots \dots \dots \text{Eq.(5)}$$

$$k_{RISC} = (k_p k_d \Phi_d) / (k_{ISC} \Phi_p) \dots \dots \dots \text{Eq.(6)}$$

<sup>1</sup>H NMR of **PXZ-SFIP**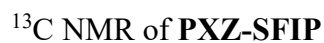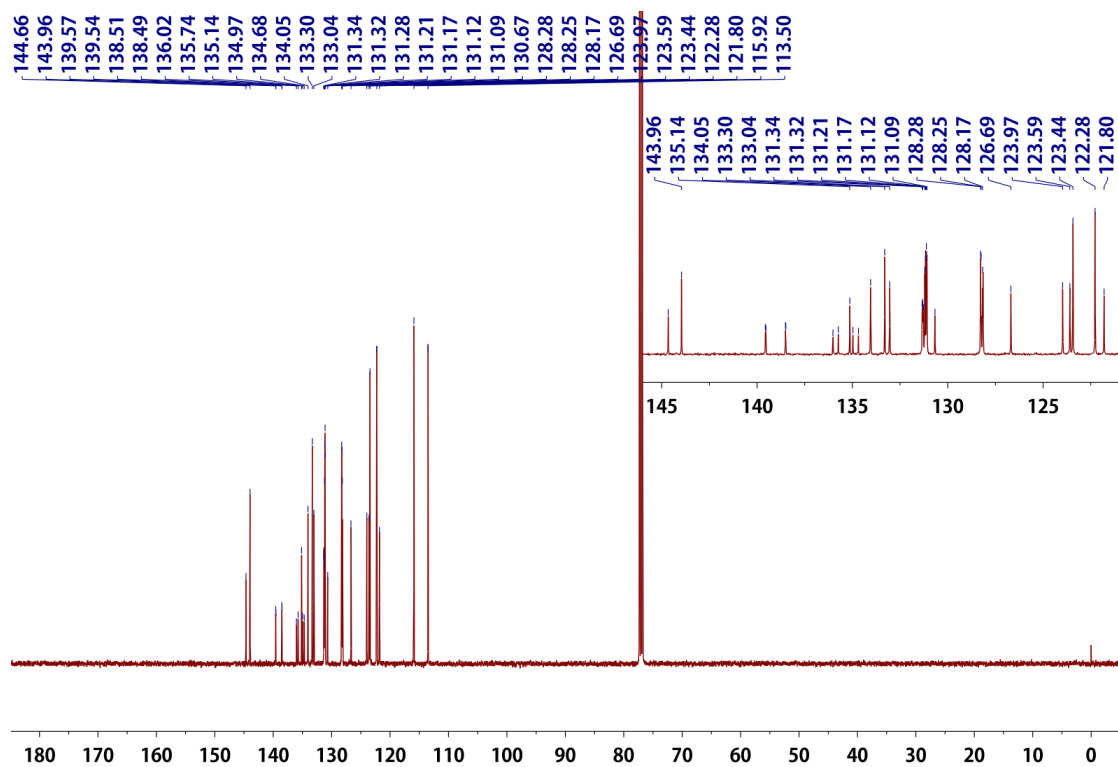

# $^1\text{H}$ NMR of PXZ-SFIC

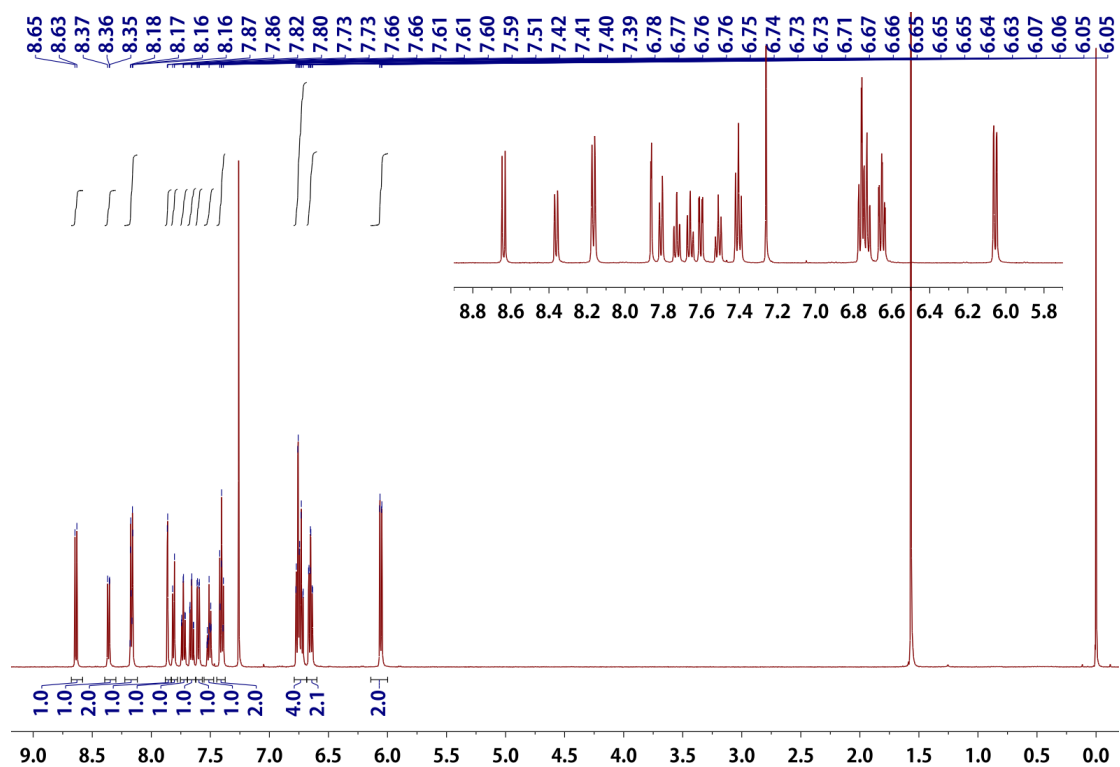

# $^{13}\text{C}$ NMR of PXZ-SFIC

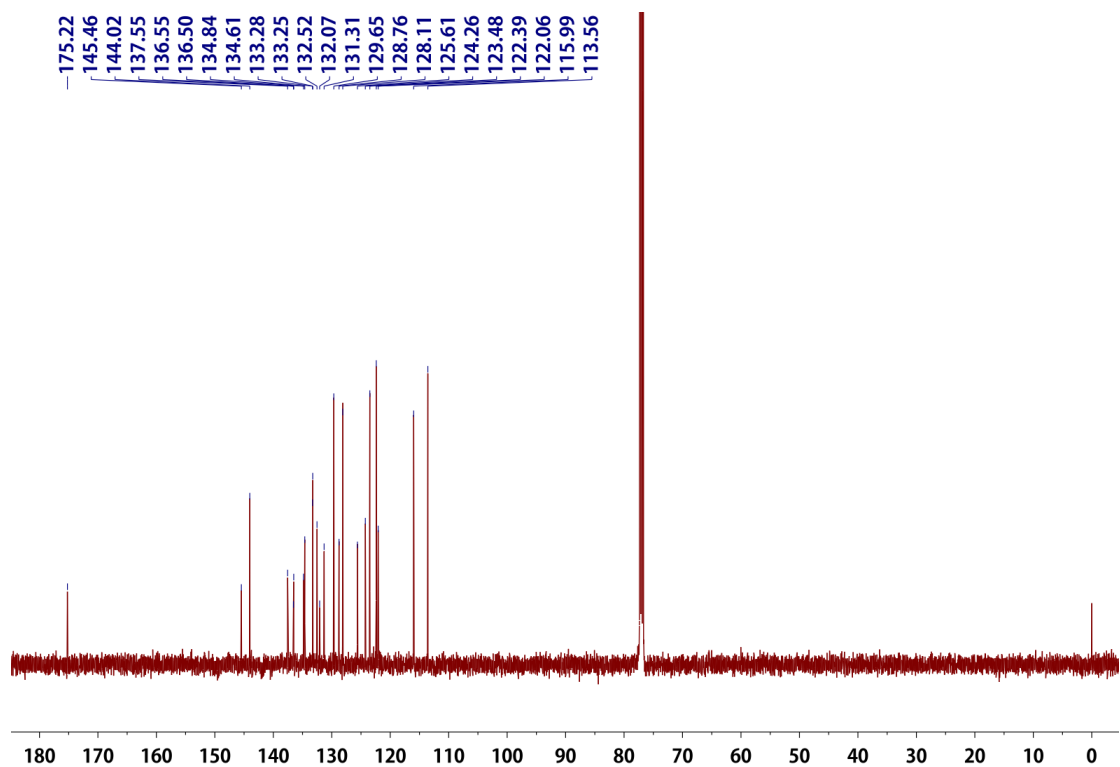

# <sup>1</sup>H NMR of PXZ-SFIS

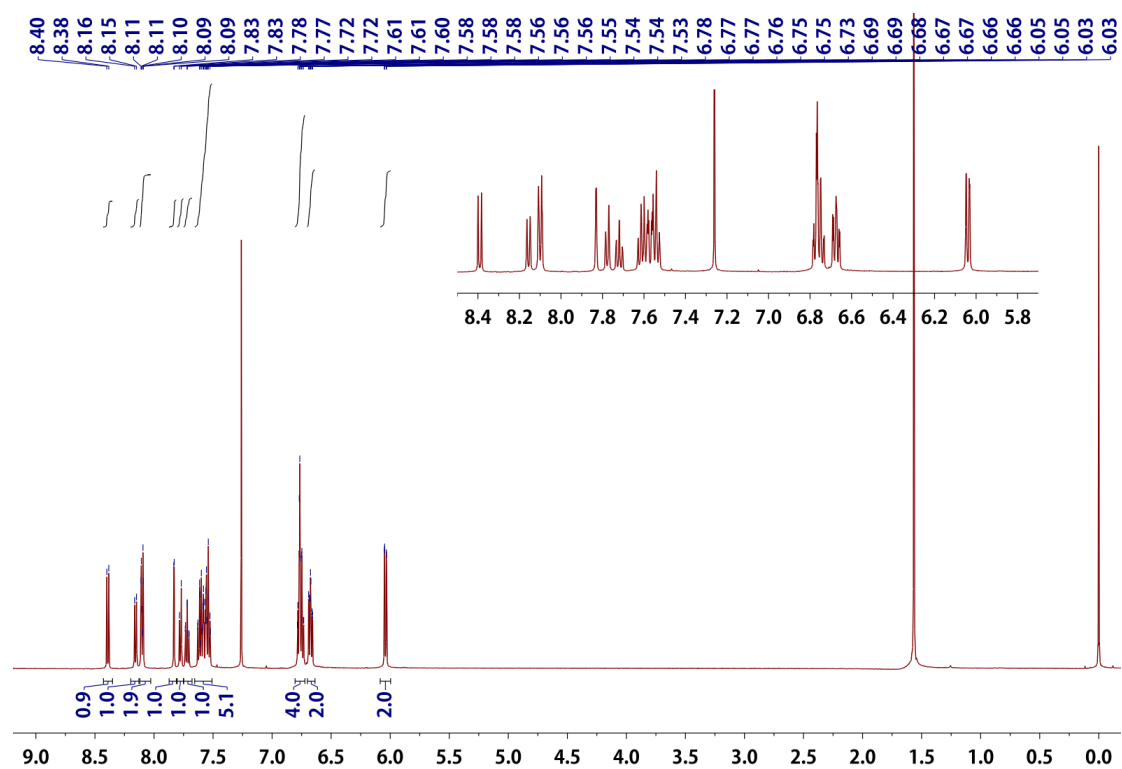

# <sup>13</sup>C NMR of PXZ-SFIS

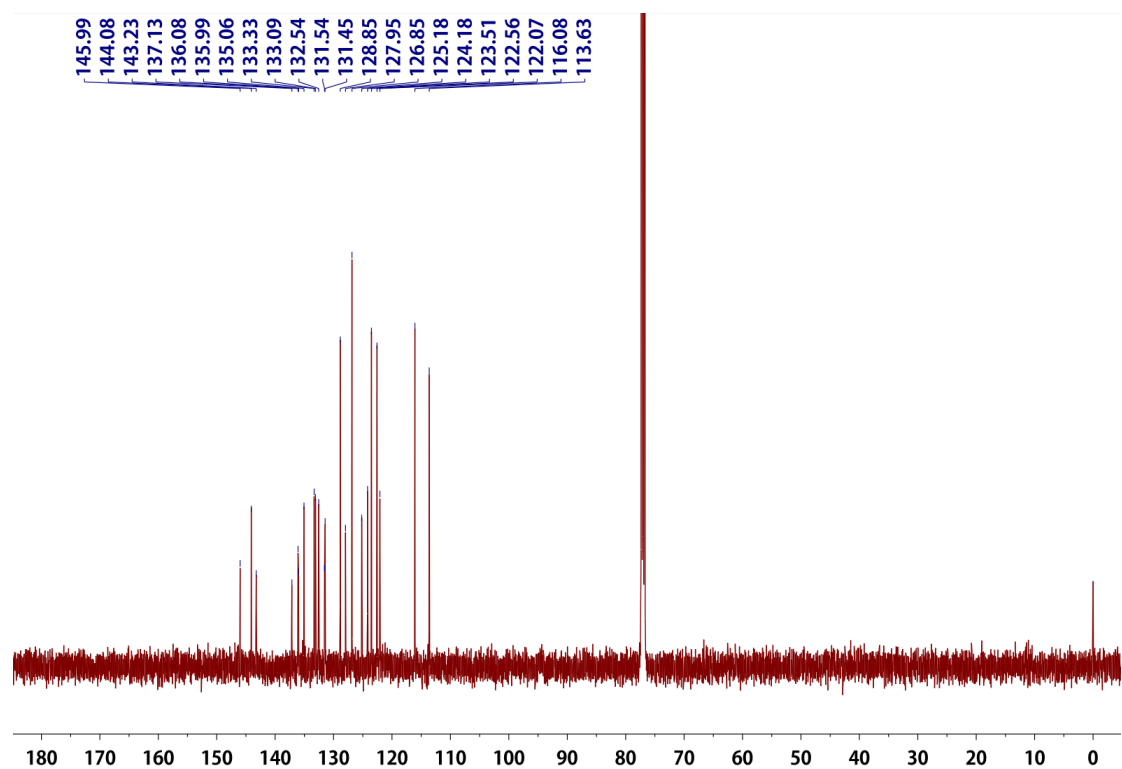



## References

1. Pan, K.-C.; Li, S.-W.; Ho, Y.-Y.; Shiu, Y.-J.; Tsai, W.-L.; Jiao, M.; Lee, W.-K.; Wu, C.-C.; Chung, C.-L.; Chatterjee, T.; Li, Y.-S.; Wong, K.-T.; Hu, H.-C.; Chen, C.-C.; Lee, M.-T., Efficient and Tunable Thermally Activated Delayed Fluorescence Emitters Having Orientation-Adjustable CN-Substituted Pyridine and Pyrimidine Acceptor Units. *Adv. Funct. Mater.* **2016**, 26, (42), 7560-7571.
2. Zhang, Q.; Kuwabara, H.; Potscavage, W. J.; Huang, S.; Hatae, Y.; Shibata, T.; Adachi, C., Anthraquinone-Based Intramolecular Charge-Transfer Compounds: Computational Molecular Design, Thermally Activated Delayed Fluorescence, and Highly Efficient Red Electroluminescence. *J. Am. Chem. Soc.* **2014**, 136, (52), 18070-18081.
